# Supplementary material for: Transcriptome regulation by PARP13 in basal and antiviral states in human cells
Source: PubMed Central journal article supplement — iScience. 2024 Feb 16;27(4):109251. doi: 10.1016/j.isci.2024.109251 (PMC10943485; doi:10.1016/j.isci.2024.109251), 2024-02-16
Supplement: mmc1.pdf [file mmc1.pdf]

**iScience, Volume 27**

**Supplemental information**

**Transcriptome regulation by PARP13 in basal  
and antiviral states in human cells**

**Veronica F. Busa, Yoshinari Ando, Stefan Aigner, Brian A. Yee, Gene W. Yeo, and Anthony  
K.L. Leung**

**Figure S1:** RNA-seq and qPCR quality control assessments related to Figure 1. A. Scatter plots of RNA-seq counts between all samples. Plot depicting replicates are shown in red. The R value for each pairwise correlation is in the upper left corner of each plot. B. Bar plots of qPCR from Fig. 1C of selected gene expression relative to WTss gene levels normalized to GAPDH. Each point represents a replicate. Error bars are +/- 1 sd.

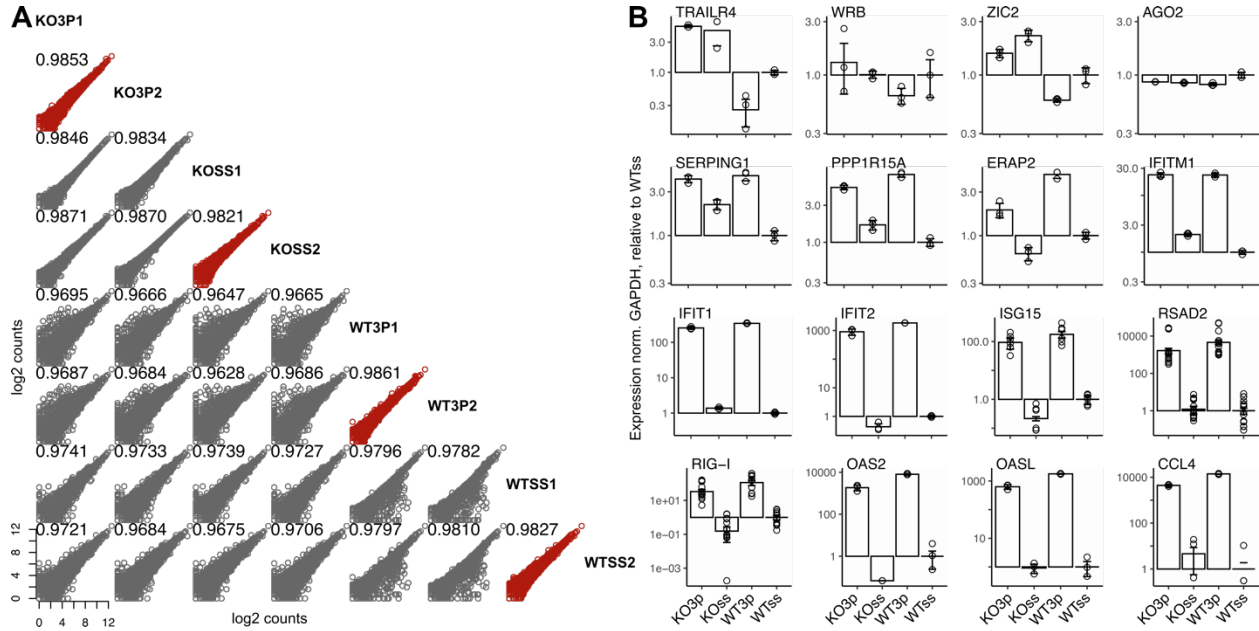

**Figure S2:** Extended images of Western blots shown in A. Figure 2E, B. Figure 4C, and C. Figure 5I. KO = PARP13 KO cells

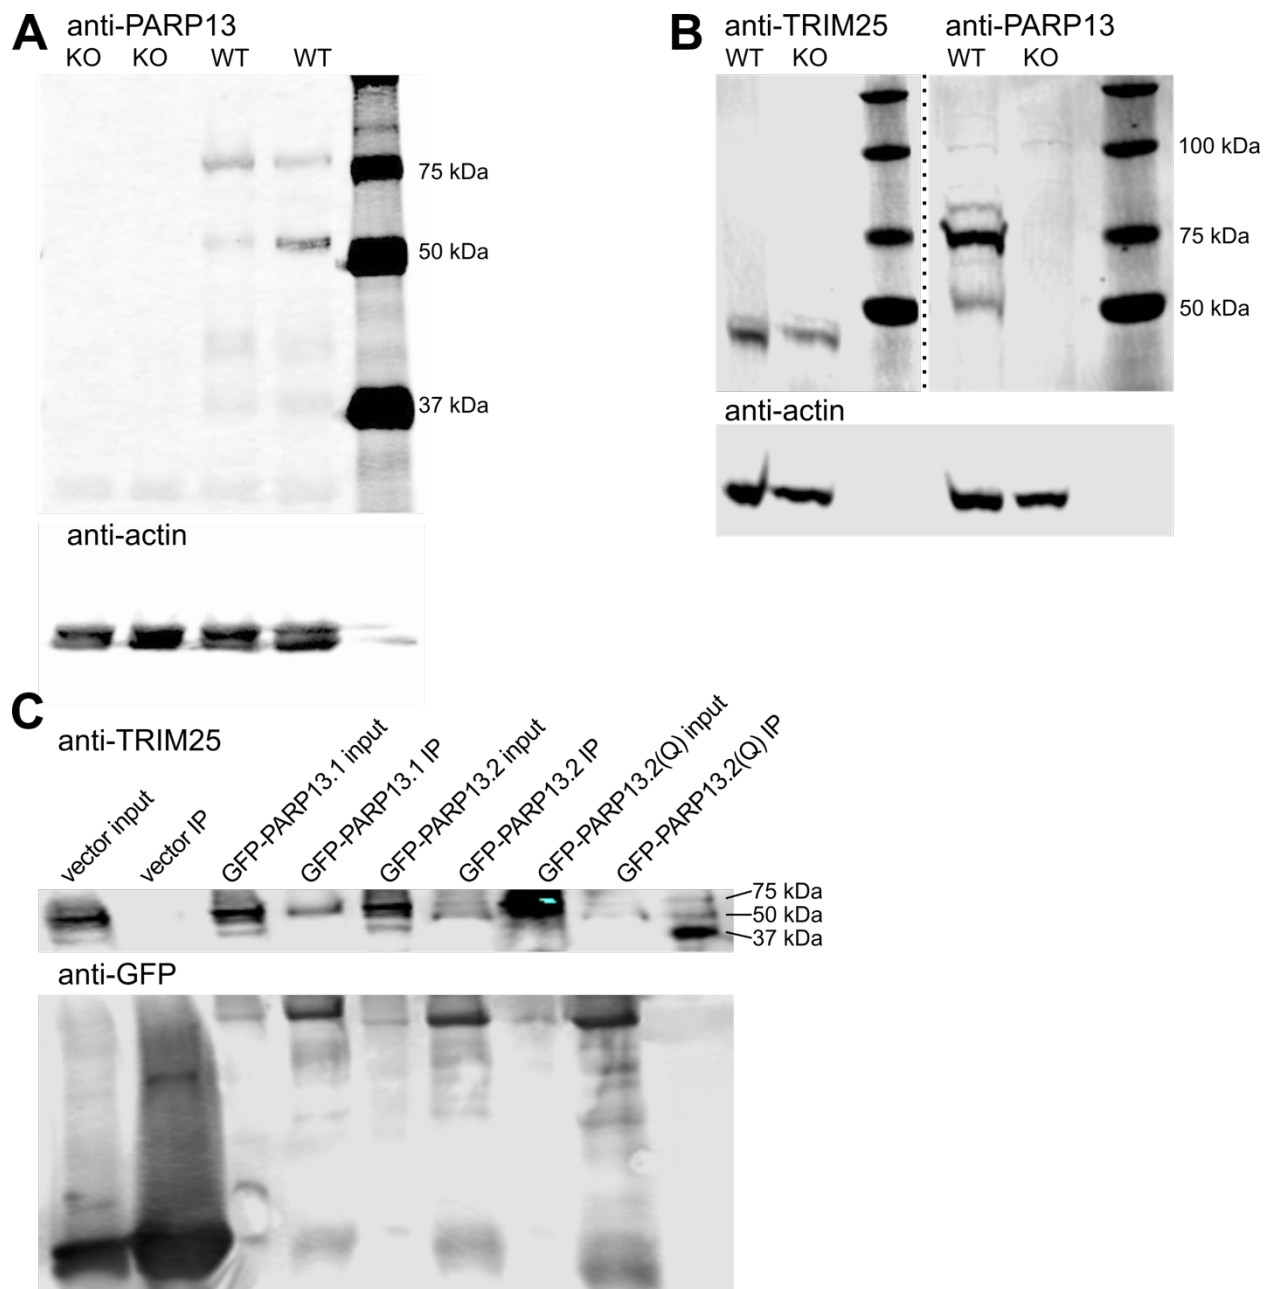

**Table S1:** Relative expression of twelve genes that are downregulated in PARP13 KO cells compared to WT cells at basal states and up-regulated upon 3p-RNA treatment in WT cells. Related to Figure 1 and 4A.

| Gene                        | KO/WT SS<br>log2FC | KO/WT SS<br>padj | P3/SS WT<br>log2FC | P3/SS WT<br>padj | KO/WT 3P<br>log2FC | KO/WT 3P<br>padj | ISGyl<br>ation |
|-----------------------------|--------------------|------------------|--------------------|------------------|--------------------|------------------|----------------|
| <b>CSF1</b>                 | -1.3826637         | 0.01880959       | 2.29278472         | 1.34E-16         | -3.400768          | 3.34E-34         |                |
| <b>DDX58<br/>(RIGI)</b>     | -2.1582511         | 0.07511729       | 7.0016834          | 2.93E-146        | -6.3531339         | 1.33E-16         | Y              |
| <b>ISG15</b>                | -1.2700558         | 0.06613593       | 6.06966307         | 1.06E-135        | -5.7254932         | 3.29E-26         | Y              |
| <b>LY6E</b>                 | -0.5485837         | 0.09399252       | 1.22268526         | 6.79E-08         | -1.6528347         | 1.66E-18         |                |
| <b>OAS3</b>                 | -3.0691376         | 4.97E-07         | 5.46489459         | 2.66E-148        | -7.7654887         | 2.32E-157        |                |
| <b>PHF11</b>                | -6.2162958         | 0.00737596       | 2.60329592         | 9.50E-07         | -7.6680384         | 2.12E-06         |                |
| <b>PPP1R15A</b>             | -2.354659          | 6.60E-17         | 1.20630142         | 0.00011046       | -3.3921319         | 7.06E-66         |                |
| <b>SHISA5</b>               | -0.8316249         | 0.00478896       | 1.58005666         | 4.86E-10         | -2.248933          | 7.77E-34         |                |
| <b>UBE2L6</b>               | -1.0642208         | 0.06614123       | 4.11120005         | 6.43E-79         | -5.0439383         | 1.11E-106        | Y              |
| <b>USP18</b>                | -1.3250928         | 0.00039169       | 3.40742688         | 2.63E-62         | -4.4255337         | 1.81E-103        | Y              |
| <b>USP41</b>                | -1.4939115         | 0.02008495       | 3.33861735         | 7.26E-38         | -4.4309707         | 1.45E-57         | Y              |
| <b>WARS</b>                 | -0.4781476         | 0.06303628       | 1.82677446         | 6.67E-25         | -2.2762076         | 2.61E-40         |                |
| <b>ZC3HAV1<br/>(PARP13)</b> | -1.4342847         | 6.00E-06         | 2.02628388         | 6.58E-21         | -3.4079062         | 2.43E-59         |                |

**Table S2:** qPCR primer sequences. Related to Figures 1C, S1B, 2C, 2G, 4B, and 4D.

| <b>TARGET</b> | <b>SEQUENCE</b>          | <b>COMMENTS</b>                                        |
|---------------|--------------------------|--------------------------------------------------------|
| AGO2_F        | CCATGTACTCGGGAGCCG       |                                                        |
| AGO2_R        | CCCAAAGTCGGGTCTAGGTG     |                                                        |
| ATP6AP1_F     | TGAGTTACAATGACACCGCTC    |                                                        |
| ATP6AP1_R     | AGTCGTTTCATAGGTCAGTGAGA  |                                                        |
| CCL4_F        | GCTTCCTCGCAACTTTGTGG     |                                                        |
| CCL4_R        | TCACTGGGATCAGCACAGAC     |                                                        |
| EIF1_F        | GAAACGGCAGGAAGACCCTTA    |                                                        |
| EIF1_R        | CGGATGCTCAATTACAGTACCAT  |                                                        |
| ERAP2_F       | TGGGGGAAAATGCAGAGGTC     |                                                        |
| ERAP2_R       | GGAGTGAACACCCGTCTTGT     |                                                        |
| GAPDH_F       | TTCGACAGTCAGCCGCATCTTCTT |                                                        |
| GAPDH_R       | GCCCAATACGACCAAATCCGTTGA |                                                        |
| HDAC3_F       | GGCAACTTCCACTACGGAGC     |                                                        |
| HDAC3_R       | GCATATTGGTGGGGCTGACT     |                                                        |
| HERC5_F       | CAACTGGGAGAGCCTTGTGGTT   |                                                        |
| HERC5_R       | CTGGACCAGTTTGCTGAAAGTGG  |                                                        |
| IFIT1_F       | AGAACGGCTGCCTAATTTACA    |                                                        |
| IFIT1_R       | GCTCCAGACTATCCTTGACCTG   |                                                        |
| IFIT2_F       | GCCGAACAGCTGAGAATTGC     |                                                        |
| IFIT2_R       | TTAGTTGCCGTAGGCTGCTC     |                                                        |
| IFITM1_F      | CTCTTCTTGAACTGGTGCTGTC   |                                                        |
| IFITM1_R      | GTCACGTCGCCAACCATCTTC    |                                                        |
| ISG15_F       | AGAGGCAGCGAACTCATCTTT    |                                                        |
| ISG15_R       | CAGCATCTTCACCGTCAGGTC    |                                                        |
| JF_585_F      | ACTGGGCAGGTGTCCACTC      | psiCHECK-3 Forward for both luciferases (spans intron) |
| JF_586_R      | GTTTGCGTTGCTCGGGGTC      | psiCHECK-3 Reverse for hRluc (modified)                |
| JF_587_R      | GAAGGGAGCAGGGCCCTTC      | psiCHECK-3 Reverse for luciferase (control)            |
| OAS2_F        | TCCTGGAGCTGGTCACACAA     |                                                        |
| OAS2_R        | CGGCTGGGTCCAAGATCAC      |                                                        |
| OASL_F        | CTGAGAAGGCAGCTCACGAA     |                                                        |
| OASL_R        | CTCCAACCCTTTGGGTCTCC     |                                                        |
| PARP13.1_F    | TCAAACCGCTGTCATGGCCCC    |                                                        |
| PARP13.1_R    | GCCAGAGTGGCTTGCGCAGAA    |                                                        |
| PARP13.2_F    | GCAGCAGATGAAGAGAGGGCCA   |                                                        |
| PARP13.2_R    | TGAGCCCAGGGCATGAACATCT   |                                                        |
| PPP1R15A_F    | TGAGACTCCCCTAAAGGCCA     |                                                        |
| PPP1R15A_R    | CCAGACAGCCAGGAAATGGA     |                                                        |

|                   |                         |
|-------------------|-------------------------|
| <b>RIG-I_F</b>    | AGAGCACTTGTGGACGCTTT    |
| <b>RIG-I_R</b>    | TGTTTTGCCACGTCCAGTCA    |
| <b>RSAD2_F</b>    | TCCTGCTTGGTGCCTGAATC    |
| <b>RSAD2_R</b>    | AGCTTCTTCTACACCAACATCCA |
| <b>SERPING1_F</b> | TCTCCTAACACTACCCCGCA    |
| <b>SERPING1_R</b> | CAGCCCACACAGGTTAAGGT    |
| <b>SLC3A2_F</b>   | TGAATGAGTTAGAGCCCGAGA   |
| <b>SLC3A2_R</b>   | GTCTTCCGCCACCTTGATCTT   |
| <b>STT3A_F</b>    | TTGGGACGAATCATTGGAGGA   |
| <b>STT3A_R</b>    | GTAAGGTGGTACGTGACGATG   |
| <b>TBP_F</b>      | GAGAGCCACGAACCACGGCA    |
| <b>TBP_R</b>      | TGCTGCCAGTCTGGACTGTTCT  |
| <b>TMED3_F</b>    | TCACCCAGATGGAGTCCGC     |
| <b>TMED3_R</b>    | AATCGTCTCGCCAACAGACC    |
| <b>TRAILR4_F</b>  | TTAAGTTCGTCTTCATC       |
| <b>TRAILR4_R</b>  | TCTGATCTATGAGATCCTGC    |
| <b>TRIM25_F</b>   | CGAGAGCACTGGATGATGTGA   |
| <b>TRIM25_R</b>   | CTGCTCCACCTTTCTGTTTGC   |
| <b>UBE2L6_F</b>   | CTGGAAGCCTTGACCAAGA     |
| <b>UBE2L6_R</b>   | GAACATGAGTTAGGAGGGCCG   |
| <b>USP18_F</b>    | CTCCTTGATTCAGGTGTTTCGTA |
| <b>USP18_R</b>    | AGGGCACGTTGCACTTCTG     |
| <b>USP41_F</b>    | TGGAGGGCAGTATGAGCTTTTT  |
| <b>USP41_R</b>    | ATGACCGGAGTCTGCCATTC    |
| <b>WRB_F</b>      | GGTTGCTGGTGCTCAGCTTC    |
| <b>WRB_R</b>      | CCGCTCTCATCTGTGACTCC    |
| <b>XBP1_F</b>     | CCCTCCAGAACATCTCCCAT    |
| <b>XBP1_R</b>     | ACATGACTGGGTCCAAGTTGT   |
| <b>ZIC2_F</b>     | CACGTCCACACCTCCGATAA    |
| <b>ZIC2_R</b>     | CTCATGGACCTTCATGTGCT    |
